# Supplementary material for: Ca2+-dependent phosphoregulation of the plasma membrane Ca2+-ATPase ACA8 modulates stimulus-induced calcium signatures
Source: PubMed Central journal article supplement (PMC5853299; doi:10.1093/jxb/erx162), 2017-05-20
Supplement: erx162_suppl_supplementary_figures_s1_s3.pdf [file erx162_suppl_supplementary_figures_s1_s3.pdf]

## **Ca<sup>2+</sup>-dependent phosphoregulation of the plasma membrane Ca<sup>2+</sup>ATPase ACA8 modulates stimulus-induced Ca<sup>2+</sup> signatures**

Alex Costa , Laura Luoni, Claudia A Marrano, Kenji Hashimoto, Philipp Köster, Sonia Giacometti, Maria Ida De Michelis , Joerg Kudla , and Maria Cristina Bonza

*Supplementary data*

**Fig. S1.** Subcellular localisation of NUP::YC3.6 probe in a representative tobacco epidermal leaf cell.

**Fig. S2.** Comparison of wounding-induced Ca<sup>2+</sup> transients in leaves of *Nicotiana* plants transiently transformed with NES::YC3.6 or NUP::YC3.6.

**Fig. S3.** Expression levels of PM-localised ACA isoforms in roots of *Arabidopsis thaliana*.  
Video S1. Series of nuclear Ca<sup>2+</sup> ratio images of a *Nicotiana* leaf subjected to wounding

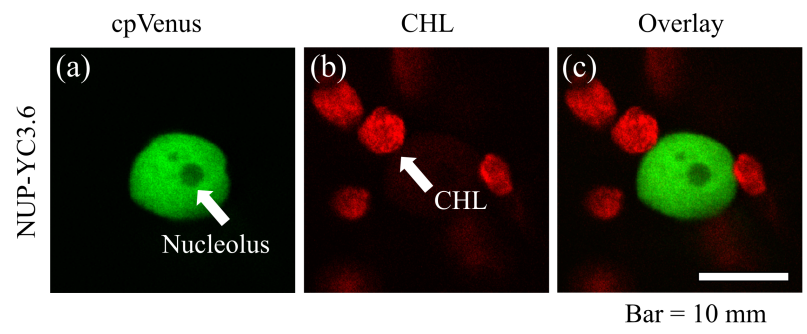

FIGURE S1

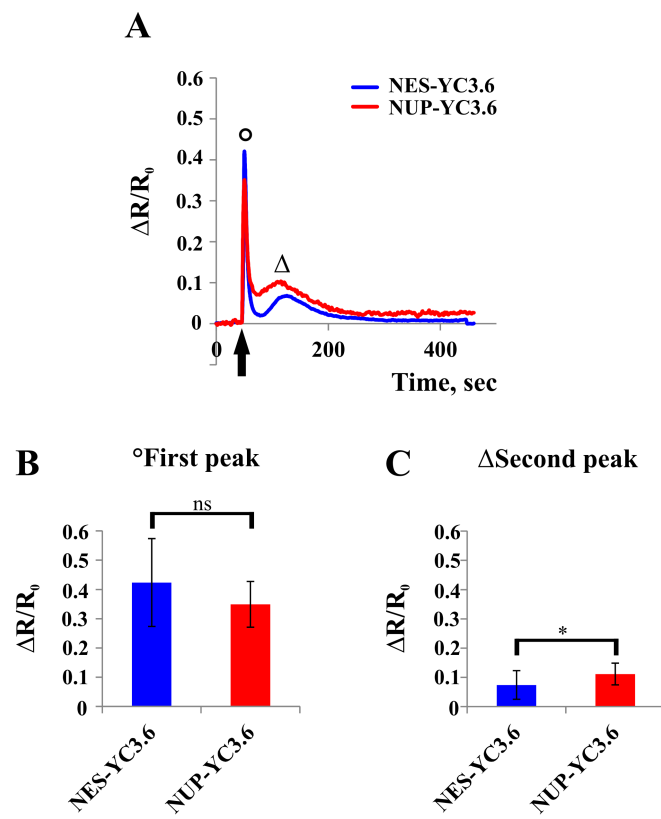

FIGURE S2

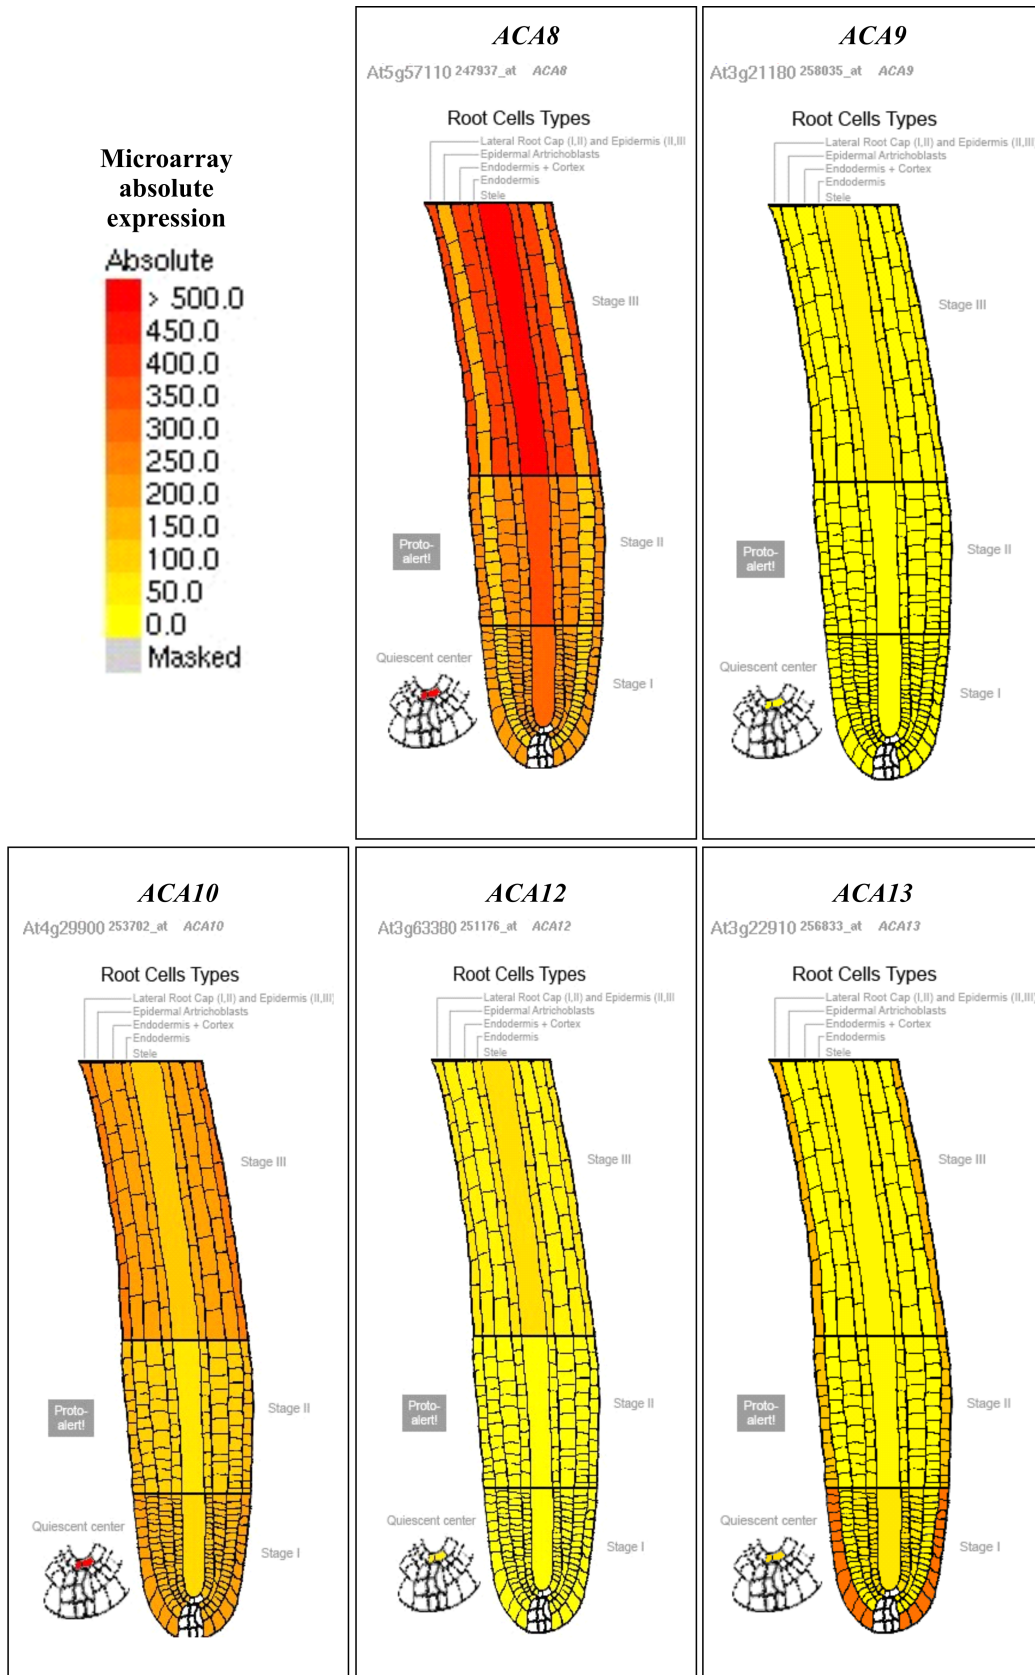

FIGURE S3
